# Supplementary material for: Common and rare genetic markers of lipid variation in subjects with type 2 diabetes from the ACCORD clinical trial
Source: PeerJ. 2017 May 2;5:e3187. doi: 10.7717/peerj.3187 (PMC5417062; doi:10.7717/peerj.3187)
Supplement: File S1 [file peerj-05-3187-s002.xlsx]

## Sheet: Replication
						Previously Reported												ACCORD results
Locus	Marker name	Chromosome	hg19 position (Mb)	MAF	Minor/major allele	TC n (1000's)	TC beta	TC -log10(p-value)	LDL n(1000's)	LDL beta	LDL -log10(p-value)	HDL n(1000's)	HDL beta	HDL -log10(p-value)	TG n(1000's)	TG beta	TG -log10(p-value)	Probe	Marker name	Chromosome	hg19 position	MAF	Minor allele	TC beta	TC -log10(p-value)	LDL beta	LDL -log10(p-value)	HDL beta	HDL -log10(p-value)	TG beta	TG -log10(p-value)
ASAP3	rs1077514	1	23.77	0.15	C/T	184	-0.03	8.22185										AX-39413065	rs1077514	1	23766233	0.2275	C	-0.05156	2.50404
LDLRAP1	rs12027135	1	25.78	0.46	A/T	178	-0.027	11.301	165	-0.03	13.699							---	rs12027135	1	25775733	0.488743	A	0.00102664	0.026469	-0.00382986	0.101871
PIGV-NR0B2	rs12748152	1	27.14	0.09	T/C				173	0.05	11.5229	187	-0.051	15	178	0.037	9	AX-39492679	rs12748152	1	27138393	0.05944	T			-0.01336	0.179536	-0.00325	0.0416273	-0.03031	0.501414
PABPC4	rs4660293	1	40.03	0.24	G/A							187	-0.035	17.5229				AX-39708829	rs4660293	1	40028180	0.1989	G					-0.0154	0.441531
PCSK9	rs2479409	1	55.5	0.32	G/A	187	0.054	38.699	173	0.064	49.5229							AX-39911995	rs2479409	1	55504650	0.3512	G	0.01638	0.576918	0.0103	0.299383
ANGPTL3	rs2131925	1	63.03	0.34	G/T	187	-0.075	79.3979	173	-0.049	31.5229				178	-0.066	73.5229	AX-82968089	rs2131925	1	63025942	0.3969	G	-0.05359	3.66635	-0.003441	0.0862921			-0.09277	9.31176
EVI5	rs7515577	1	93.01	0.23	C/A	95	-0.037	7.69897										---	rs7515577	1	93009438	0.163844	C	-0.0016483	0.0314442
SORT1	rs629301	1	109.82	0.24	G/T	156	-0.134	169.699	143	-0.167	240.301							AX-38933141	rs629301	1	109818306	0.2423	G	-0.09643	8.43004	-0.1351	14.6253
ANXA9-CERS2	rs267733	1	150.96	0.16	G/A				165	-0.033	8.30103							AX-39088387	rs267733	1	150958836	0.121	G			-0.03872	1.1027
HDGF-PMVK	rs12145743	1	156.7	0.34	G/T							181	0.02	7.69897				AX-39101621	rs12145743	1	156700651	0.2709	G					0.0174	0.57659
ANGPTL1	rs4650994	1	178.52	0.49	G/A							187	0.021	8.1549				AX-39175069	rs4650994	1	178515312	0.4483	A					-0.00261	0.0697643
ZNF648	rs1689800	1	182.17	0.35	G/A							187	-0.034	19.301				AX-39187393	rs1689800	1	182168885	0.3533	G					-0.01996	0.815025
MOSC1	rs2642442	1	220.97	0.33	C/T	111	-0.035	10.5229	102	-0.036	10.301							AX-39353525	rs2642442	1	220973563	0.29	C	-0.01913	0.680062	-0.01364	0.408713
GALNT2	rs4846914	1	230.3	0.41	G/A							187	-0.048	40.3979	178	0.04	30.1549	AX-11530726	rs4846914	1	230295691	0.4907	A					0.03669	1.94846	-0.02222	0.825359
IRF2BP2	rs514230	1	234.86	0.48	A/T	95	-0.039	13.301	90	-0.036	11.0458							AX-83094403	rs514230	1	234858597	0.409	A	-0.01236	0.407379	-0.01785	0.626536
APOB	rs1367117	2	21.26	0.32	A/G	187	0.1	138.523	173	0.119	182							AX-11256895	rs1367117	2	21263900	0.2585	A	0.05103	2.81276	0.05387	2.86774
GCKR	rs1260326	2	27.73	0.39	T/C	187	0.051	41.5229							178	0.115	238.699	AX-11217561	rs1260326	2	27730940	0.3435	T	0.04498	2.59517					0.09334	8.87844
ABCG5/8	rs4299376	2	44.07	0.31	G/T	158	0.079	72.5229	145	0.081	71.3979							---	rs4299376	2	44072576	0.268776	G	-0.0338036	1.4919	-0.0380245	1.67825
EHBP1	rs2710642	2	63.15	0.35	G/A				173	-0.024	8.22185							---	rs2710642	2	63149557	0.302762	G			0.00648773	0.165167
INSIG2	rs10490626	2	118.84	0.08	A/G	184	-0.042	8.22185	173	-0.051	11.699							AX-13597041	rs10490626	2	118835841	0.06085	A	0.02525	0.414314	0.01547	0.214599
LOC84931	rs2030746	2	121.31	0.4	T/C	187	0.02	7.39794	173	0.021	8.04576							AX-82980515	rs2030746	2	121309488	0.4303	T	0.03382	1.77859	0.04211	2.37397
RAB3GAP1	rs7570971	2	135.84	0.35	A/C	185	0.03	13										AX-13663668	rs7570971	2	135837906	0.4551	C	-0.01751	0.605198
COBLL1	rs12328675	2	165.54	0.13	C/T							187	0.045	14.699				---	rs12328675	2	165540800	0.1237	C					0.00142409	0.0238913
ABCB11	rs2287623	2	169.83	0.41	G/A	184	0.027	11.3979										AX-13749439	rs2287623	2	169830155	0.4122	G	0.01954	0.771856
FAM117B	rs11694172	2	203.53	0.25	G/A	187	0.028	8.69897										---	rs11694172	2	203532304	0.211049	G	-3.15925e-05	0.000649756
CPS1	rs1047891	2	211.54	0.33	A/C							182	-0.027	9.04576				AX-13826903	rs1047891	2	211540507	0.3116	A					-0.01255	0.41184
FN1	rs1250229	2	216.3	0.27	T/C				173	-0.024	7.52288							AX-83492241	rs1250229	2	216304384	0.2355	T			-0.01053	0.267445
IRS1	rs2972146	2	227.1	0.37	G/T							184	0.032	16.699	175	-0.028	14.5229	AX-13869175	rs2972146	2	227100698	0.276	G					0.02775	1.16552	-0.03147	1.28075
UGT1A1	rs11563251	2	234.68	0.12	T/C	187	0.037	9	173	0.034	7.30103							AX-11159292	rs11563251	2	234679384	0.1529	T	0.04417	1.5904	0.06803	3.00135
ATG7	rs2606736	3	11.4	0.39	C/T							129	0.025	7.30103				AX-14082185	rs2606736	3	11400249	0.4174	C					0.001191	0.0307239
RAF1	rs2290159	3	12.63	0.23	C/G	94	-0.037	8.69897										AX-14107485	rs2290159	3	12628920	0.2177	C	-0.01783	0.539102
CMTM6	rs7640978	3	32.53	0.09	T/C	186	-0.038	7.69897	172	-0.039	8							AX-14288217	rs7640978	3	32533010	0.1207	T	-0.02639	0.654626	-0.03722	1.00758
SETD2	rs2290547	3	47.06	0.2	A/G							187	-0.03	8.39794				---	rs2290547	3	47061183	0.140063	A					-0.047375	1.80267
RBM5	rs2013208	3	50.13	0.5	T/C							170	0.025	11.0458				---	rs2013208	3	50129399	0.464067	C					0.0102804	0.350697
STAB1	rs13326165	3	52.53	0.21	A/G							187	0.029	10.0458				AX-41249473	rs13326165	3	52532118	0.217	A					0.01376	0.396639
PXK	rs13315871	3	58.38	0.1	A/G	187	-0.036	7.39794										AX-41258847	rs13315871	3	58381287	0.0744	A	-0.07589	2.46344
GSK3B	rs6805251	3	119.56	0.39	T/C							186	0.02	8				AX-14098905	rs6805251	3	119560606	0.4967	T					0.01835	0.686766
ACAD11	rs17404153	3	132.16	0.14	T/G				172	-0.034	8.69897	187	-0.028	8.30103				AX-41113689	rs17404153	3	132163200	0.1026	T			-0.02819	0.627825	0.01679	0.350276
MSL2L1	rs645040	3	135.93	0.23	G/T										178	-0.029	11.699	AX-14125105	rs645040	3	135926622	0.2305	G							-0.03833	1.6059
LRPAP1	rs6831256	4	3.47	0.42	G/A	187	0.025	10	173	0.022	7.69897				177	0.026	11.699	AX-41465187	rs6831256	4	3473139	0.463	G	0.01478	0.536704	-0.0005595	0.013497			0.02028	0.794796
C4orf52	rs10019888	4	26.06	0.18	G/A							187	-0.027	7.30103				---	rs10019888	4	26062990	0.170737	G					-0.00740601	0.165941
KLHL8	rs442177	4	88.03	0.42	G/T										178	-0.031	18	AX-14783441	rs442177	4	88030261	0.4218	G							-0.01333	0.457424
FAM13A	rs3822072	4	89.74	0.46	A/G							187	-0.025	11.3979				---	rs3822072	4	89741269	0.494591	A					-0.00819731	0.268516
ADH5	rs2602836	4	100.01	0.44	A/G							187	0.019	7.30103				---	rs2602836	4	100014805	0.457717	A					-0.0132035	0.46088
SLC39A8	rs13107325	4	103.19	0.08	T/C							179	-0.071	15				AX-11239808	rs13107325	4	103188709	0.06056	T					-0.08039	2.40539
ARL15	rs6450176	5	53.3	0.26	A/G							187	-0.025	9.1549				AX-15067668	rs6450176	5	53298025	0.2805	A					-0.01392	0.455684
MAP3K1	rs9686661	5	55.86	0.2	T/C										177	0.038	15.5229	---	rs9686661	5	55861786	0.195545	T							0.01021	0.231711
HMGCR	rs12916	5	74.66	0.4	C/T	183	0.068	73.301	168	0.073	77.0969							AX-11231912	rs12916	5	74656539	0.3783	C	0.03925	2.22033	0.04473	2.57025
CSNK1G3	rs4530754	5	122.86	0.46	G/A	187	-0.023	8.69897	173	-0.028	11.3979							AX-14874247	rs4530754	5	122855416	0.4228	G	-0.02696	1.22665	-0.03032	1.37438
TIMD4	rs6882076	5	156.39	0.36	T/C	187	-0.051	40.301	173	-0.046	30.5229				178	-0.029	14.699	AX-83219432	rs6882076	5	156390297	0.4189	T	-0.01218	0.400554	-0.01044	0.312293			-0.01443	0.479516
MYLIP	rs3757354	6	16.13	0.24	T/C	187	-0.035	14.699	173	-0.038	16.699							AX-15307290	rs3757354	6	16127407	0.2548	T	-0.01502	0.462685	-0.02358	0.809388
HFE	rs1800562	6	26.09	0.07	A/G	185	-0.056	11.699	171	-0.062	13.0969							AX-11344635	rs1800562	6	26093141	0.04497	A	-0.02483	0.342562	-0.0394	0.592949
HLA	rs3177928	6	32.41	0.17	A/G	180	0.048	21	166	0.045	16.5229							AX-11436526	rs3177928	6	32412435	0.1281	A	0.02407	0.610125	0.01918	0.425159
C6orf106	rs2814982	6	34.55	0.12	T/C	187	-0.044	14.3979										AX-11412025	rs2814982	6	34546560	0.1395	T	0.002368	0.0423448
KCNK17	rs2758886	6	39.25	0.3	A/G	187	0.023	7.52288										AX-41972755	rs2758886	6	39250837	0.2562	A	0.02701	1.01782
VEGFA	rs998584	6	43.76	0.49	A/C							184	-0.026	10.699	175	0.029	14.5229	---	rs998584	6	43757896	0.440096	A					-0.0257541	1.16319	0.0383167	1.96008
FRK	rs9488822	6	116.31	0.36	T/A	95	0.034	9	90	0.031	6.69897							---	rs9488822	6	116312893	0.346252	T	-0.0108933	0.331998	-0.00824441	0.224237
RSPO3	rs1936800	6	127.44	0.49	C/T							187	0.02	9.52288	168	-0.02	7.52288	---	rs1936800	6	127436064	0.494876	C					-0.032	1.76035	-0.000639446	0.0157414
HBS1L	rs9376090	6	135.41	0.28	C/T	187	-0.025	8.52288										AX-11684095	rs9376090	6	135411228	0.207	C	-0.0148	0.406936
CITED2	rs605066	6	139.83	0.42	C/T							94	-0.028	7.52288				---	rs605066	6	139829666	0.459315	C					0.0197211	0.812826
LPA	rs1564348	6	160.58	0.18	C/T	187	0.049	22.5229	173	0.048	20.5229							AX-11275971	rs1564348	6	160578860	0.148	C	0.02495	0.692718	9.432e-05	0.00160987
GPR146	rs1997243	7	1.08	0.16	G/A	183	0.033	9.52288										AX-82943189	rs1997243	7	1083777	0.1169	G	0.01395	0.285419
DAGLB	rs702485	7	6.45	0.45	G/A							187	0.024	11.2218				AX-15725152	rs702485	7	6449272	0.4486	A					-0.003675	0.101275
SNX13	rs4142995	7	17.92	0.38	T/G							165	-0.026	11.0458				---	rs4142995	7	17919258	0.479816	T					-0.00923989	0.300389
DNAH11	rs12670798	7	21.61	0.25	C/T	187	0.036	16	173	0.034	13.301							AX-15641576	rs12670798	7	21607352	0.2628	C	-0.007948	0.212469	0.002561	0.0574959
MIR148A	rs4722551	7	25.99	0.2	C/T	187	0.029	8.1549	173	0.039	13.3979				178	0.023	10.0458	AX-42177013	rs4722551	7	25991826	0.1282	C	0.01315	0.274007	0.04142	1.22731			-0.02054	0.463315
NPC1L1	rs2072183	7	44.58	0.29	C/G	184	0.036	14.3979	170	0.039	15.1549
IKZF1	rs4917014	7	50.31	0.32	G/T							187	0.022	8				AX-12585881	rs4917014	7	50305863	0.2829	G					-0.01099	0.333295
TYW1B	rs13238203	7	72.13	0.04	T/C										102	-0.059	5.52288	---	rs13238203	7	72129667	0.022792	T							-0.117696	1.6783
MLXIPL	rs17145738	7	72.98	0.13	T/C							185	0.041	12.301	176	-0.115	98.0458	AX-11310085	rs17145738	7	72982874	0.1121	T					0.054	1.96497	-0.1373	8.94923
MET	rs38855	7	116.36	0.47	G/A										178	-0.019	7.69897	AX-15536176	rs38855	7	116358044	0.4231	G							0.001347	0.0325456
KLF14	rs4731702	7	130.43	0.49	T/C							187	0.029	16.301				AX-15566866	rs4731702	7	130433384	0.4156	T					0.01009	0.337904
TMEM176A	rs17173637	7	150.53	0.12	C/T							184	-0.036	7.69897				---	rs17173637	7	150529449	0.081282	C					-0.0439937	1.14
PPP1R3B	rs9987289	8	9.18	0.1	A/G	174	-0.084	35.699	160	-0.071	23.0458	169	-0.082	40.699				AX-42485973	rs9987289	8	9183358	0.1103	A	-0.03235	0.830032	-0.01418	0.26504	-0.04928	1.63846
PINX1	rs11776767	8	10.68	0.37	C/G										177	0.022	10.5229	AX-15808581	rs11776767	8	10683929	0.4173	C							0.01666	0.571217
NAT2	rs1495741	8	18.27	0.26	G/A	92	0.032	7.52288							88	0.04	11.5229	AX-15912862	rs1495741	8	18272881	0.2837	G	0.01209	0.36171					0.01324	0.389766
LPL	rs12678919	8	19.84	0.13	G/A							187	0.155	149	178	-0.17	198.699	AX-11222716	rs12678919	8	19844222	0.09277	G					0.1995	17.2621	-0.1923	14.2767
SOX17	rs10102164	8	55.42	0.21	A/G	187	0.03	10.301	173	0.032	10.3979							AX-11092877	rs10102164	8	55421614	0.1922	A	0.009456	0.231806	0.0249	0.770062
CYP7A1	rs2081687	8	59.39	0.36	T/C	95	0.038	11.0458	90	0.031	7							AX-83104807	rs2081687	8	59388565	0.3069	T	0.02763	1.17276	0.02067	0.721704
TRPS1	rs2293889	8	116.6	0.41	T/G							180	-0.031	16.3979				AX-42310201	rs2293889	8	116599199	0.3575	T					-0.03773	2.0074
TRIB1	rs2954029	8	126.49	0.47	T/A	187	-0.062	64.699	173	-0.056	49.699	187	0.04	28.5229	178	-0.076	107	---	rs2954029	8	126490972	0.43902	T	-0.057418	4.41684	-0.036192	1.88872	0.0283731	1.43966	-0.0684725	5.67621
PLEC1	rs11136341	8	145.04	0.4	G/A	87	0.038	8.22185	83	0.045	11.1549							AX-42362309	rs11136341	8	145043543	0.3893	G	-0.01085	0.346787	0.004111	0.105906
VLDLR	rs3780181	9	2.64	0.08	G/A	186	-0.044	9.1549	172	-0.044	8.69897							---	rs3780181	9	2640759	0.096701	G	-0.0446423	1.15571	-0.0516343	1.35128
TTC39B	rs581080	9	15.31	0.21	G/C	187	-0.038	13				187	-0.042	19				AX-16172741	rs581080	9	15305378	0.2459	G	0.007475	0.183229			-0.01436	0.423313
ABCA1	rs1883025	9	107.66	0.25	T/C	187	-0.067	52.2218				186	-0.07	64.699				AX-11349824	rs1883025	9	107664301	0.2779	T	-0.03363	1.54653			-0.03493	1.727
ABO	rs9411489	9	136.155	0.21	T/C	130	0.069	34.5229	119	0.077	40.699
AKR1C4	rs1832007	10	5.25	0.18	G/A										178	-0.033	11.699	AX-38832513	rs1832007	10	5254847	0.1238	G							0.02142	0.487716
VIM-CUBN	rs10904908	10	17.26	0.43	G/A	187	0.025	10.5229										AX-11130788	rs10904908	10	17260290	0.4295	G	0.01266	0.440932
MARCH8-ALOX5	rs970548	10	46.01	0.26	C/A	187	0.025	8.09691				187	0.026	9.69897				AX-16023363	rs970548	10	46013277	0.2293	C	0.01955	0.620332			0.03224	1.34151
JMJD1C	rs10761731	10	65.03	0.44	T/A										91	-0.031	11.0969	AX-11119644	rs10761731	10	65027610	0.3924	T							-0.02844	1.28225
CYP26A1	rs2068888	10	94.84	0.45	A/G										178	-0.024	10.699	AX-38909715	rs2068888	10	94839642	0.4427	A							-0.04228	2.37768
GPAM	rs2255141	10	113.93	0.3	A/G	187	0.031	15.1549	173	0.03	13							AX-14818951	rs2255141	10	113933886	0.2434	A	-0.01073	0.2909	-0.02043	0.635637
AMPD3	rs2923084	11	10.39	0.18	G/A							187	-0.026	7.30103				AX-16466997	rs2923084	11	10388782	0.2632	G					-0.004886	0.119244
SPTY2D1	rs10128711	11	18.63	0.3	T/C	157	-0.031	11										AX-16548348	rs10128711	11	18632984	0.3885	T	-0.03923	1.9594
LRP4	rs3136441	11	46.74	0.18	C/T							187	0.054	28.1549				AX-39082867	rs3136441	11	46743247	0.1431	C					0.00455	0.0849169
OR4C46	rs11246602	11	51.51	0.15	C/T							176	0.034	9.69897				---	rs11246602	11	51512090	0.110366	C					-0.0176288	0.385969
FADS1-2-3	rs174546	11	61.57	0.36	T/C	187	-0.048	36.5229	173	-0.051	38.699	187	-0.039	27.0969	178	0.045	37.1549	AX-11324878	rs174546	11	61569830	0.3062	T	-0.004644	0.118216	-0.02433	0.893469	-0.06144	4.41499	0.06554	4.42922
KAT5	rs12801636	11	65.39	0.23	A/G							187	0.024	7.52288				AX-39137625	rs12801636	11	65391317	0.2402	A					0.01616	0.512155
MOGAT2-DGAT2	rs499974	11	75.46	0.19	A/C							187	-0.026	8				AX-12588188	rs499974	11	75455021	0.2094	A					-0.0171	0.512155
APOA1	rs964184	11	116.65	0.84	C/G	95	-0.121	54.5229	90	-0.086	25.699	94	0.106	47.2218	91	-0.234	223.155	AX-11698800	rs964184	11	116648917	0.1622	G	0.08371	5.04881	-0.02721	0.777804	-0.07189	4.09066	0.1967	23.4816
PHLDB1	rs11603023	11	118.49	0.42	T/C	187	0.022	8										AX-38970063	rs11603023	11	118486067	0.4194	T	0.01899	0.758952
UBASH3B	rs7941030	11	122.52	0.39	C/T	187	0.028	13.699				187	0.027	14				AX-83218574	rs7941030	11	122522375	0.396	C	0.05575	4.07012			0.0303	1.5613
ST3GAL4	rs11220462	11	126.24	0.14	A/G	157	0.047	14.2218	145	0.059	20.1549							AX-38986755	rs11220462	11	126243952	0.1283	A	0.03872	1.16743	0.0362	0.991826
PHC1-A2ML1	rs4883201	12	9.08	0.12	G/A	187	-0.035	8.69897										AX-11533381	rs4883201	12	9082581	0.1018	G	0.00432	0.0696624
PDE3A	rs7134375	12	20.47	0.43	A/C							187	0.021	8				AX-16895189	rs7134375	12	20473758	0.394	A					0.02789	1.38112
LRP1	rs11613352	12	57.79	0.26	T/C							187	0.028	12.699	178	-0.028	13.0458	AX-83306643	rs11613352	12	57792580	0.1914	T					0.007087	0.167172	-0.01918	0.530178
MVK	rs7134594	12	110	0.48	C/T							94	-0.035	12.699				AX-39286623	rs7134594	12	110000193	0.4465	C					-0.0509	3.67305
BRAP	rs11065987	12	112.07	0.41	G/A	187	-0.031	15.699	173	-0.027	11							AX-11141403	rs11065987	12	112072424	0.324	G	-0.03884	1.92555	-0.03403	1.4608
HNF1A	rs1169288	12	121.42	0.34	C/A	176	0.032	16.3979	163	0.038	20.2218							---	rs1169288	12	121416650	0.307192	C	0.0475137	2.66317	0.0482807	2.54704
SBNO1	rs4759375	12	123.8	0.08	T/C							94	0.056	7.52288				---	rs4759375	12	123796238	0.112873	T					0.0281239	0.732181
ZNF664	rs4765127	12	124.46	0.35	T/G							94	0.032	9.09691	91	-0.029	7.69897	AX-50098142	rs4765127	12	124460167	0.3207	T					0.01721	0.633204	-0.01075	0.315424
SCARB1	rs838880	12	125.26	0.34	C/T							173	0.048	31.2218				AX-39313433	rs838880	12	125261593	0.4025	C					0.02362	1.02315
BRCA2	rs4942486	13	32.95	0.48	T/C				172	0.024	10.699							AX-17145464	rs4942486	13	32953388	0.4803	T			0.01651	0.604499
NYNRIN	rs8017377	14	24.88	0.46	A/G				173	0.03	14.5229							AX-39734263	rs8017377	14	24883887	0.379	A			0.03079	1.31042
ZBTB42-AKT1	rs4983559	14	105.28	0.4	G/A							184	0.02	8				AX-39720605	rs4983559	14	105277209	0.4552	G					0.009796	0.320209
CAPN3	rs2412710	15	42.68	0.04	A/G										154	0.099	10.699	AX-12909509	rs2412710	15	42683787	0.02984	A							0.04264	0.499352
FRMD5	rs2929282	15	44.25	0.07	T/A										84	0.072	8.69897	AX-12911079	rs2929282	15	44245931	0.1012	T							0.05076	1.37407
LIPC	rs1532085	15	58.68	0.4	A/G	186	0.054	46.1549				185	0.107	188	176	0.031	17.699	AX-12939636	rs1532085	15	58683366	0.4038	A	-0.007756	0.235824			0.08445	9.25228	-0.01787	0.661145
LACTB	rs2652834	15	63.4	0.21	A/G							186	-0.028	10.3979				AX-11403394	rs2652834	15	63396867	0.2014	A					-0.01627	0.474696
PDXDC1	rs3198697	16	15.13	0.43	T/C										176	-0.02	7.69897	AX-40003819	rs3198697	16	15129940	0.3105	T							-0.01902	0.607831
CTF1	rs11649653	16	30.92	0.4	G/C										90	-0.027	6.69897	AX-40026137	rs11649653	16	30918487	0.3618	G							-0.03275	1.43004
FTO	rs1121980	16	53.81	0.43	A/G							186	-0.02	8.1549	155	0.021	7.52288	AX-11151648	rs1121980	16	53809247	0.4474	A					-0.003454	0.0968557	-0.01364	0.459045
CETP	rs3764261	16	56.99	0.32	A/C	177	0.05	30.3979	165	-0.053	33.699	178	0.241	769	169	-0.04	24.699	AX-11478953	rs3764261	16	56993324	0.3105	A	0.0478	2.83803	0.001248	0.0284922	0.1923	39.655	-0.005237	0.133595
LCAT	rs16942887	16	67.93	0.14	A/G							186	0.083	53.0969				AX-11291871	rs16942887	16	67928042	0.1396	A					0.07227	3.78728
HPR	rs2000999	16	72.11	0.2	A/G	186	0.062	40.1549	172	0.065	40.3979							AX-11359140	rs2000999	16	72108093	0.1852	A	0.05674	2.86391	0.06128	3.03452
CMIP	rs2925979	16	81.53	0.31	T/C							186	-0.035	19				AX-40101997	rs2925979	16	81534790	0.3056	T					-0.0185	0.691649
DLG4	rs314253	17	7.09	0.37	C/T	184	-0.023	9.52288	170	-0.024	9.52288							AX-11436133	rs314253	17	7091650	0.3604	C	0.003381	0.0894823	0.01142	0.35047
STARD3	rs11869286	17	37.81	0.35	G/C							178	-0.032	16.5229				AX-40175267	rs11869286	17	37813856	0.4386	G					-0.0144	0.497709
MPP3	rs8077889	17	41.88	0.22	C/A										176	0.025	8	AX-11664148	rs8077889	17	41878166	0.1988	C							0.01534	0.399681
OSBPL7	rs7206971	17	45.43	0.49	A/G	85	0.03	7	81	0.029	6.52288							---	rs7206971	17	45425115	0.47167	A	-0.0175422	0.682735	-0.00827789	0.245001
APOH-PRXCA	rs1801689	17	64.21	0.04	C/A				111	0.103	11							AX-11344739	rs1801689	17	64210580	0.02736	C			0.02921	0.293197
ABCA8	rs4148008	17	66.88	0.33	G/C							166	-0.028	12				AX-13224417	rs4148008	17	66875294	0.3726	G					-0.01065	0.348044
PGS1	rs4129767	17	76.4	0.48	G/A							185	-0.024	10.699				AX-40243297	rs4129767	17	76403984	0.4458	A					0.02983	1.52129
LIPG	rs7241918	18	47.16	0.19	G/T	93	-0.058	17.3979				93	-0.09	44				AX-11616916	rs7241918	18	47160953	0.1343	G	0.009255	0.184223			-0.1201	8.69897
MC4R	rs12967135	18	57.85	0.25	A/G							154	-0.026	7.39794				---	rs12967135	18	57849023	0.247311	A					-0.000277132	0.00630063
INSR	rs7248104	19	7.22	0.42	A/G										176	-0.022	9.30103	AX-40483635	rs7248104	19	7224431	0.3829	A							-0.02755	1.22134
ANGPTL4	rs7255436	19	8.43	0.47	C/A							93	-0.032	7.69897				---	rs7255436	19	8433196	0.48019	C					0.0215816	0.9129
LDLR	rs6511720	19	11.2	0.12	T/G	185	-0.185	201.301	171	-0.221	261.398							AX-11569288	rs6511720	19	11202306	0.114	T	-0.05588	1.96417	-0.06541	2.36876
ANGPTL8	rs737337	19	11.35	0.11	C/T							185	-0.056	16.301				AX-40397699	rs737337	19	11347493	0.1701	C					-0.04814	1.91865
CILP2	rs10401969	19	19.41	0.09	C/T	186	-0.137	76.3979	171	-0.118	53.5229				176	-0.121	69	---	rs10401969	19	19407718	0.100159	C	-0.0504591	1.55272	-0.0151167	0.277123			-0.0694549	2.47483
PEPD	rs731839	19	33.9	0.35	G/A							185	-0.022	8.52288	176	0.022	8.52288	AX-75172720	rs731839	19	33899065	0.3739	G					0.01129	0.379656	-0.003805	0.0984327
APOE	rs4420638	19	45.42	0.19	G/A	104	0.197	149	93	0.225	177.699	100	-0.067	20.699				AX-11504955	rs4420638	19	45422946	0.1709	G	0.05501	2.51527	0.03998	1.40649	-0.09422	6.78304
FLJ36070	rs492602	19	49.21	0.47	G/A	184	0.031	16										AX-11536589	rs492602	19	49206417	0.4455	G	0.02064	0.8173
HAS1	rs17695224	19	52.32	0.26	A/G							185	-0.029	12.699				AX-11335536	rs17695224	19	52324216	0.2439	A					-0.005162	0.130886
LILRA3	rs386000	19	54.79	0.26	C/G							165	0.048	22.5229				AX-40473499	rs386000	19	54792761	0.2333	C					0.05417	3.07743
SPTLC3	rs364585	20	12.96	0.38	A/G				172	-0.025	9.39794							AX-12558863	rs364585	20	12962718	0.3347	A			-0.03354	1.52812
SNX5	rs2328223	20	17.85	0.21	C/A				171	0.03	8.22185							AX-11385188	rs2328223	20	17845921	0.1925	C			-0.0006268	0.0119764
ERGIC3	rs2277862	20	34.15	0.15	T/C	186	-0.035	10.301										AX-11380864	rs2277862	20	34152782	0.1665	T	-0.02461	0.738975
MAFB	rs2902940	20	39.09	0.3	G/A	186	-0.024	9.04576	172	-0.027	10.699							---	rs2902940	20	39091487	0.332006	G	0.0137854	0.438767	0.0293741	1.19472
TOP1	rs6029526	20	39.67	0.47	A/T	93	0.04	16	88	0.044	17.301							AX-13513492	rs6029526	20	39672618	0.4425	T	-0.01956	0.771087	-0.03149	1.46725
HNF4A	rs1800961	20	43.04	0.05	T/C	156	-0.106	24				158	-0.127	33.699				AX-11344678	rs1800961	20	43042364	0.02711	T	-0.0829	1.29115			-0.08375	1.37654
PLTP	rs6065906	20	44.55	0.19	C/T							186	-0.059	39.301	176	0.053	33.699	AX-83307464	rs6065906	20	44554015	0.1677	C					-0.02966	0.985479	0.02919	0.87844
UBE2L3	rs181362	22	21.93	0.23	T/C							178	-0.038	17.3979				AX-40847853	rs181362	22	21932068	0.2725	T					-0.02475	0.96457
MTMR3	rs5763662	22	30.38	0.04	T/C				163	0.077	8							AX-13874630	rs5763662	22	30378703	0.03293	T			0.01137	0.108295
TOM1	rs138777	22	35.71	0.36	A/G	185	0.021	7.30103										AX-83245167	rs138777	22	35711098	0.4436	A	0.00544	0.147337
PLA2G6	rs5756931	22	38.55	0.4	C/T										174	-0.02	7.52288	---	rs5756931	22	38546033	0.323105	C							-0.00500632	0.123593
PPARA	rs4253772	22	46.63	0.11	T/C	185	0.032	8	171	0.031	7.52288							AX-40938033	rs4253772	22	46627603	0.0894	T	0.0173	0.322302	0.03006	0.628009
